# Supplementary material for: Long-Term Immunomodulatory Impact of VNS on Peripheral Cytokine Profiles and Its Relationship with Clinical Response in Difficult-to-Treat Depression (DTD)
Source: MDPI journal article supplement (doi:10.3390/ijms25084196), 2024-04-10
Supplement: s1 [file s1]

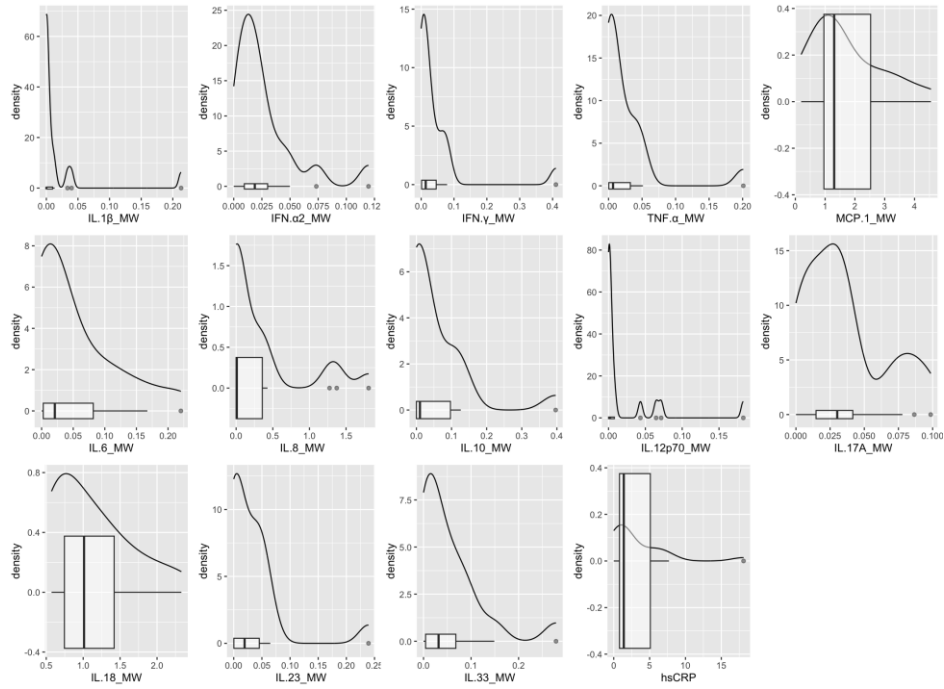

**Figure S1.** Density plots for methodological (wet-lab) QC: both timepoints combined. Outliers were tolerated due to the nature of the distribution of the data, the limited sample size, and the exploratory set-up.

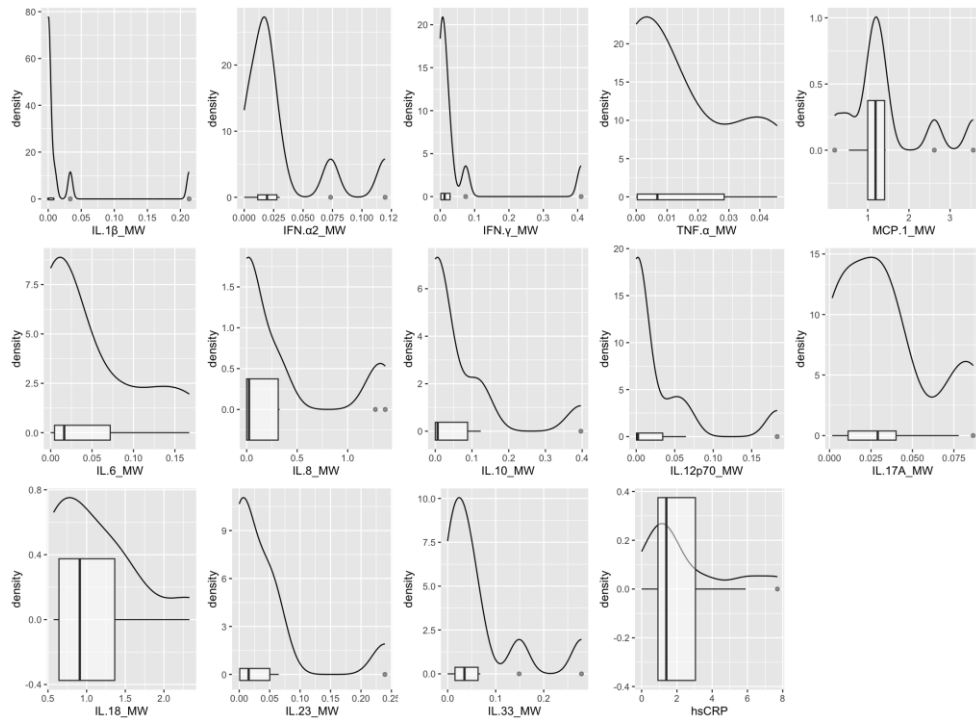

**Figure S2.** Density plots: cytokines at baseline.

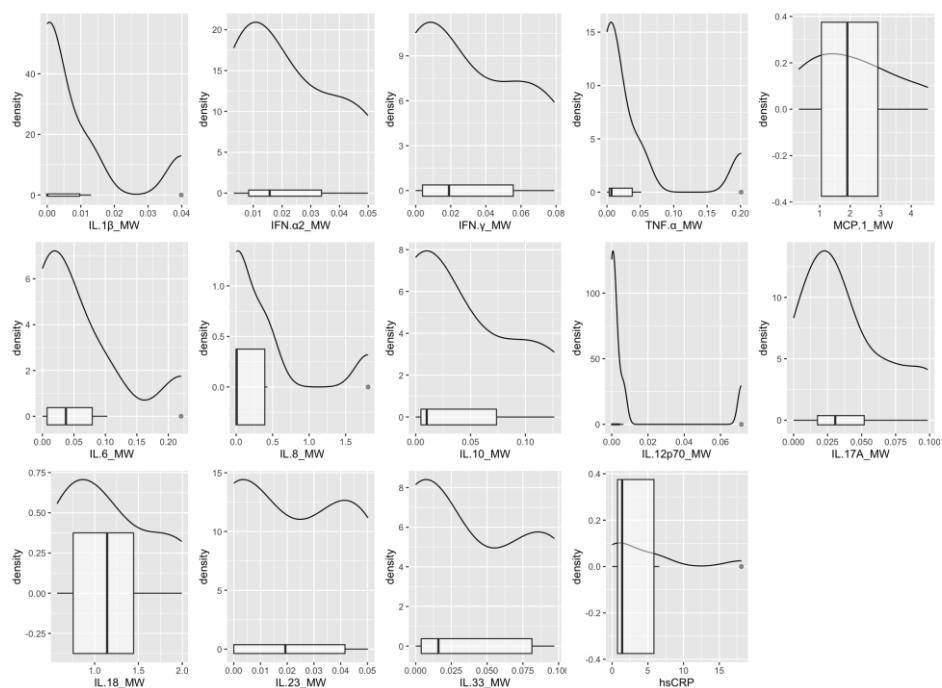

Figure S3. Density plots: cytokines at 6 months.

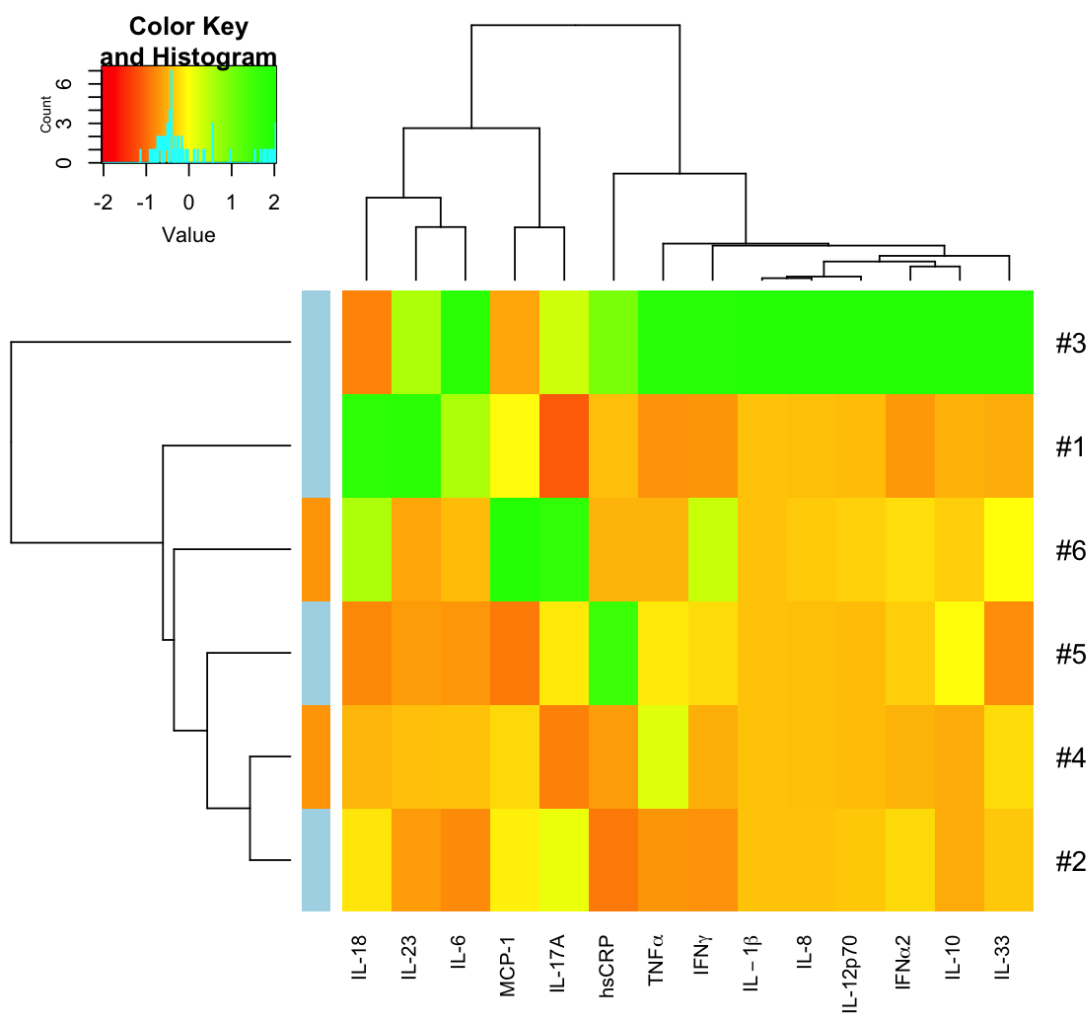

(a)

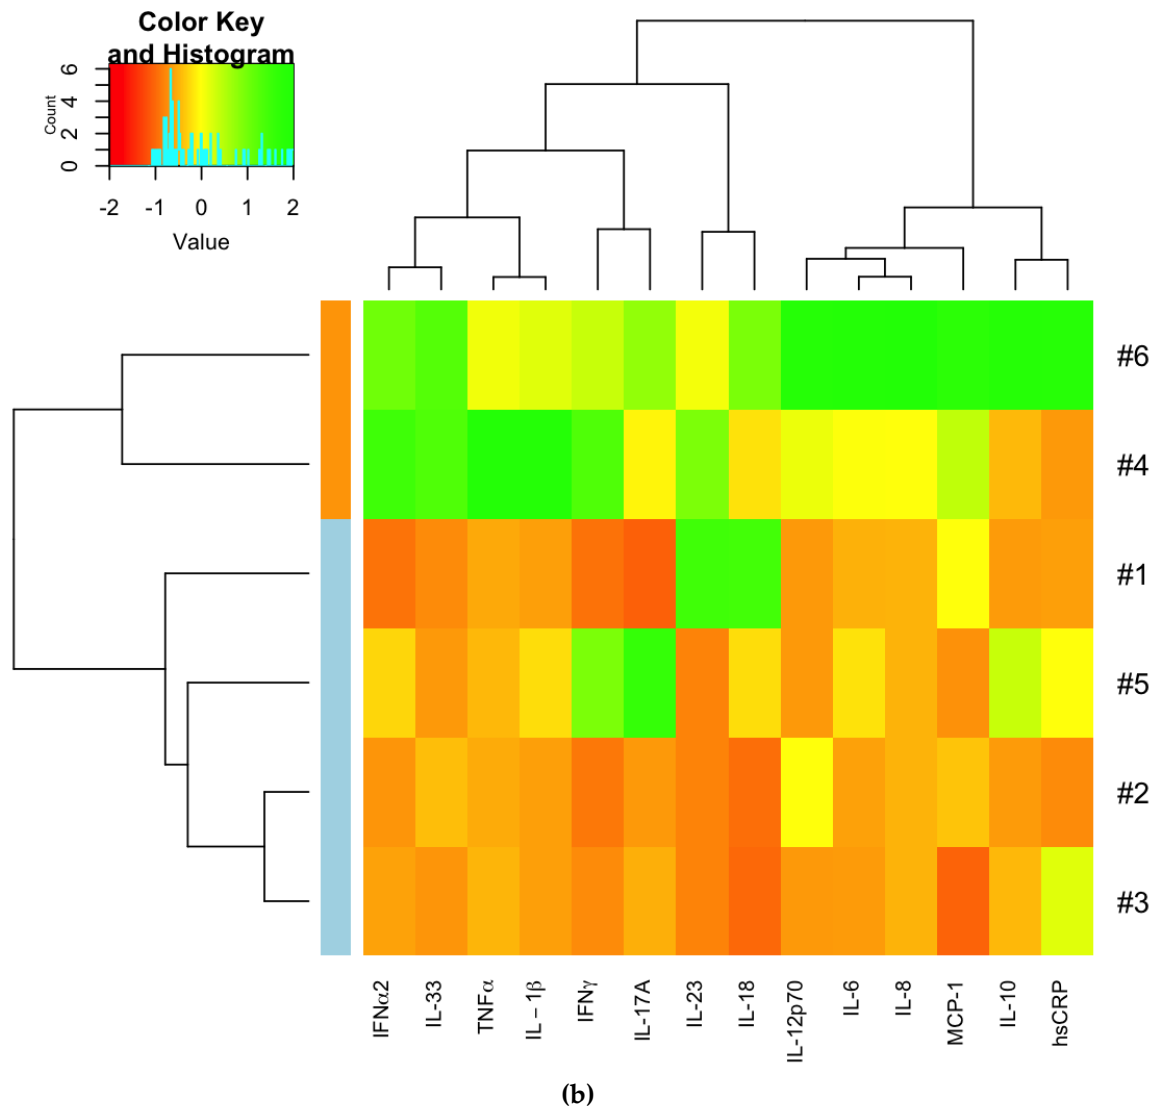

**Figure S4.** Exploratory clustering through hierarchical clustering methods. Exploratory heatmaps at baseline (A) and after 6 months of treatment (B). The colored side-bars in the heatmap (left) reflect the response status after 12 months of treatment (blue = response, orange = no response).
